# Supplementary material
Source: publisher figshare collection journal article supplement (https://brill.figshare.com/ndownloader/files/31257769)
Supplement: Supplementary file 1 [file 31257769]

APPENDIX A

Table A1. Details of the vegetation and climatic and edaphic descriptors of the study sites.

|  |  | Wet | Dry1 | Dry2 | Dry3 |
| --- | --- | --- | --- | --- | --- |
| Vegetation | Type | Rainforest (Atlantic Forest) | Savanna/cerrado *sensu stricto* (Cerrado) | Semi-deciduous seasonal forest (Atlantic Forest) | Woodland savanna/cerradão (Cerrado) |
| Description | Canopy composed mainly of evergreen trees (30–40 m) with contiguous crowns, resulting in a dense closed appearance that is maintained throughout the year and emergent species (60 m); subcanopy (5–20 m); and an understorey composed of shrubs and trees. Woody lianas and epiphytic species are abundant. a | Continuous herbaceous stratum (ground layer), interrupted by shrubs and trees (wood layer). Sclerophylly  is common, (*e.g.*, thick cuticles, sunken stomata, and lignified and silicified tissues). Xylopodia can occur in both the woody and ground layers. b | Irregular canopy (15–20 m) composed of deciduous, semi-deciduous and evergreen species.  Emergent trees (30 m) with leaf buds protected from water stress by cataphyllum or trichomes.  Dense understorey composed of herbaceous and shrub species. Lianas are present. a | Irregular canopy (8–15 m) composed of deciduous, semi-deciduous and evergreen species. Understorey show a distinct shrub stratum and herbaceous stratum composed of grasses. The vegetation has xeromorphic aspect with tortuous trees and irregular branching a,b |
|  |  |  |  |  |  |
| Climatic | Total annual rainfall (mm) c | 1539 | 1403 | 1286 | 1308 |
| Total rainfall of the wet season (mm) c | 948 | 1012 | 915 | 873 |
| Total rainfall of the dry season (mm) c | 591 | 390 | 371 | 419 |
| Mean annual temperature (°C) c | 20.7 (10.6–29.2) | 21.5 (12.9–29.3) | 22.1 (11.5–30.7) | 21.6 (10.7–30.1) |
| Mean relative humidity (%) d | 78.5 (59.7–96.4) | 59.9 (30.0–94) | 69 (28.5–95.1) | 68.7 (30.3–95.3) |
| Global solar radiation (MJ m–2 day–1) d | 11 (0.6–25.3) | 15.6 (1.2–31.0) | 17 (0–30.8) | 25 (2–39.6) |
| Mean wind speed (m s–1) d | 0.4 (0–1.5) | 3.4 (0.9–7.3) | 1.3 (0.2–3.7) | 1.4 (0 - 3) |
|  |  |  |  |  |  |
| Edaphic | Soil type e | Dystrophic Haplic Cambisols | Dystrophic Red Latosol or Dystrophic Red-Yellow Latosol | Dystrophic Red-Yellow Latosol | Dystrophic Red-Yellow Latosol |
| Organic matter (g.dm–3) e | 15 | 22 | 36 | 18.5 |
| pH e | 4.1 | 3.9 | 4.85 | 3.78 |
| P (mg dm–3) £ | 1.75 | 4 | 9.17 | 4.67 |
| Al+3 (mmolc dm–3) e | 19.2 | 14 | 2.5 | 6.33 |
| H+Al (mmolc dm–3) e | 59.77 | 52 | 31.5 | 42.83 |
| K (mmolc dm–3) e | 1.95 | 0.5 | 1.72 | 0.13 |
| Ca (mmolc dm–3) e | 5 | 1 | 38.83 | 1.33 |
| Mg (mmolc dm–3) £ | 2 | 1 | 10.33 | 1.33 |
| Bases added (mmolc.dm-3) e | 9 | 3 | 50.88 | 2.79 |
| Cation exchange capacity (mmolc dm–3) e | 68.77 | 55 | 82.38 | 45.62 |
| Base saturation (%)e | 13 | 5 | 54.15 | 6.34 |
| Sand (g kg–1) f | 390 | 870 | 860 | 810 |
| Clay (g kg–1) f | 500 | 99 | 120 | 155 |
| Silt (g kg–1) f | 110 | 31 | 20 | 35 |
| Soil texture f | Clayey | Sandy | Sandy | Sandy |
| Soil moisture (%)f | 39 | 8 | 12 | 13 |

a Obtained from Ivanauskas N, Assis M. 2012. Formações florestais brasileiras. In*:* Martins SV, ed. *Ecologia de Florestas Tropicais do Brasil*: 107–140 UFV, Rio de Janeiro.

b Obtained from Oliveira-Filho A, Ratter J. 2002. Vegetation physiognomies and woody flora of the Cerrado biome. In: Oliveira PS, Marquis RJ, eds. *The Cerrados of Brazil*: 91–120. Columbia University Press, New York, NY.

c Rainfall values are shown as means and the temperature values are shown as means (minimum–maximum). Both descriptors were obtained between 2005–2015 and were provided by the Meteorological Station of the Faculdade de Ciências Agronômicas, UNESP, Botucatu, São Paulo, Brazil (dry1); the Integrated Agrometeorological Information Center (http://www.ciiagro.sp.gov.br) (dry2 and dry3); and the Agrometeorological Monitoring System (https://www.agritempo.gov.br/agritempo) (wet).

d The values are shown as means (minimum–maximum) observed in 2003–2006 and were provided by the Meteorological Station of the Faculdade de Ciências Agronômicas, UNESP, Botucatu, São Paulo, Brazil (dry1) and from Destefani *et al*. 2006. Clima. In ESALQ–USP, 4° Relatório Temático do Projeto Parcelas Permanentes, Parte II: Clima, 1–54. http://www.lerf.eco.br/capa.asp?j=7 (wet, dry2 and dry3).

e Obtained from Cooper *et al*. 2006. Solos. In*:* ESALQ–USP. *4° Relatório Temático do Projeto Parcelas Permanentes, Parte II: Fatores Abióticos*, 157–221. Available online at http://www.lerf.eco.br/capa.asp?j=7 (wet); Milanez C. 2007. *Estudos anatômicos e ultra-estruturais em Melastomataceae de Cerrado*. PhD Thesis. Universidade Estadual Paulista, Botucatu (dry1); Viani *et al.* 2011. Savanna soil fertility limits growth but not survival of tropical forest tree seedlings. *Plant Soil* 349: 341–353. doi: 0.1007/s11104-011-0879-7 (dry2 and dry3)

f  Obtained from Cooper *et al.* 2013. Soil functioning in a toposequence under rainforest in São Paulo, Brazil. *Revista Brasileira de Ciência do Solo* 37: 392–399. doi: 10.1590/S0100-06832013000200010 (wet); Lara *et al*. 2017. Duration of cambial activity is determined by water availability while cambial stimulus is day-length dependent in a Neotropical evergreen species. *Environmental and Experimental Botany* 141: 50–59. doi: 10.1016/j.envexpbot.2017.07.001 (dry1); Cooper *et al*. 2012. Hydro-physical characterization of soils under tropical semi-deciduous forest. *Scientia Agricola* 69: 152–159. doi: 10.1590/S0103-90162012000200011 (dry2); Juhás *et al*. 2006. Dinâmica físico-hídrica de uma topossequência de solos sob savana florestada (Cerradão) em Assis, SP. *Revista Brasileira de Ciência do Solo* 30: 401–412. doi: 10.1590/S0100-06832006000300002 (dry3).
